# Supplementary material for: Synthesis of scaly Sn3O4/TiO2nanobelt heterostructures for enhanced UV-visible light photocatalytic activity
Source: Royal Society of Chemistry journal article supplement (doi:10.1039/c4nr05749j), 2015-01-01
Supplement: c4nr05749j1.pdf [file c4nr05749j1.pdf]

## Supporting Information

### **Synthesis of Scaly $\text{Sn}_3\text{O}_4/\text{TiO}_2$ Nanobelts Heterostructure for Enhanced UV-Visible Light Photocatalytic Activity**

Guohui Chen<sup>†a</sup>, Shaozheng Ji<sup>†a</sup>, Yuanhua Sang<sup>a</sup>, Sujie Chang<sup>a</sup>, Pin Hao<sup>a</sup>, Zhenhuan Zhao<sup>a</sup>,  
Jerome Claverie<sup>c</sup>, Hong Liu<sup>a,b\*</sup>, Guangwei Yu<sup>a\*</sup>

<sup>a</sup>State Key Laboratory of Crystal Materials, Shandong University, Jinan, Shandong 250100, China

<sup>b</sup>Beijing Institute of Nanoenergy and Nanosystems, Chinese Academy of Science, Beijing 100864, China.

<sup>c</sup>NanoQAM Research Center, Department of Chemistry, University of Quebec at Montreal, 2101 rue Jeanne-Mance, CP 8888, Montreal, Quebec H3C3P8, Canada.

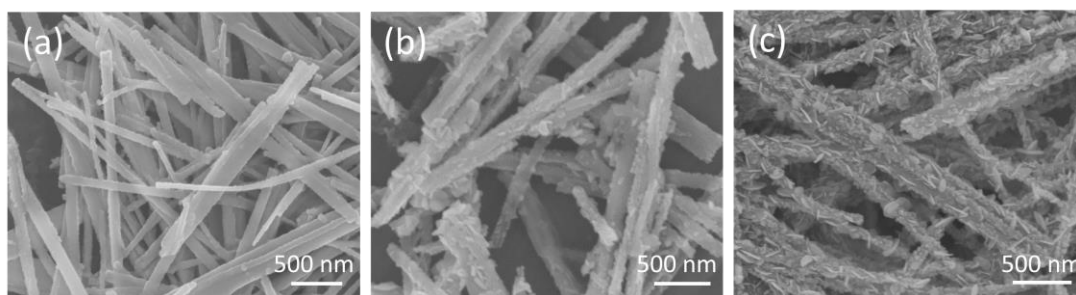

**Figure S1.** SEM images of scaly  $\text{Sn}_3\text{O}_4/\text{TiO}_2$  (molar ratio  $\text{Sn}/\text{Ti}=2/1$ ) heterostructure obtained at different synthetic stages of (a) 1 h; (b) 4 h; (c) 12 h.

To well understand the synthesis process of scaly  $\text{Sn}_3\text{O}_4/\text{TiO}_2$  nanobelt heterostructure, morphology of the hybrid photocatalysts synthesized at 180 °C for different time was observed (Figure S1). Almost nothing can be observed at the surface of  $\text{TiO}_2$  nanobelts for the sample obtained after a 1 hour hydrothermal treatment. Prolonging the reaction time to 4 h, many nanoparticles dispersed on the  $\text{TiO}_2$  nanobelts can be found. When the reaction time is extended to 12 h, most of the nanoparticles have been converted into  $\text{Sn}_3\text{O}_4$  nanoflakes. The images agree well with the prediction of synthetic process of the  $\text{Sn}_3\text{O}_4/\text{TiO}_2$  heterostructure; 1) nucleation of  $\text{Sn}_3\text{O}_4$

nanoparticles on the surface of the  $\text{TiO}_2$  nanobelts, which is driven by the absorption of  $\text{Sn}^{2+}$  cations on  $-\text{OH}$  groups<sup>1</sup> on the surface coarsened  $\text{TiO}_2$  nanobelts; (2) growth of  $\text{Sn}_3\text{O}_4$  nuclei nanoflakes connected to  $\text{TiO}_2$  lattice with a specific orientation.

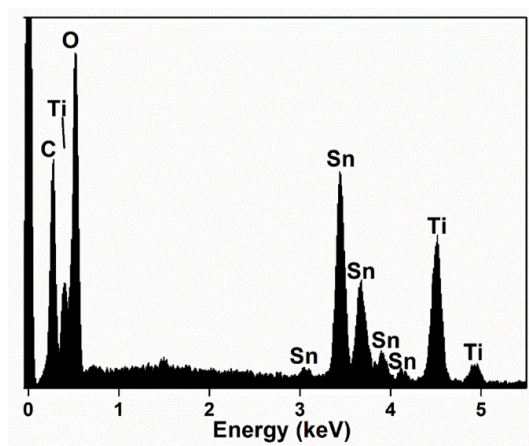

**Figure S2.** EDS analysis of the scaly  $\text{Sn}_3\text{O}_4/\text{TiO}_2$  (molar ratio  $\text{Sn}/\text{Ti}=2/1$ ) nanobelts heterostructure.

Figure S2 represents EDS analysis of the scaly  $\text{Sn}_3\text{O}_4/\text{TiO}_2$  nanobelts heterostructure when the initial  $\text{Sn}/\text{Ti}$  molar ratio designed as  $2/1$ , confirming the existence of  $\text{Ti}$ ,  $\text{Sn}$ ,  $\text{O}$ , and the weight ratio of  $\text{Sn}_3\text{O}_4$  (52.5%).

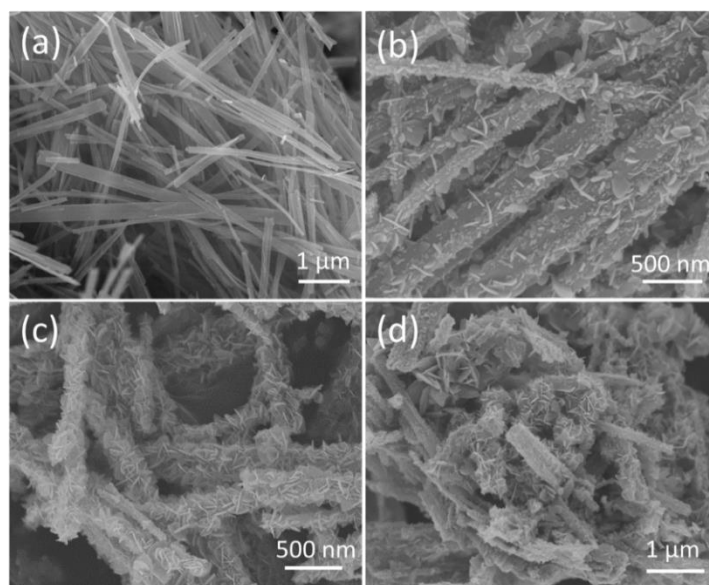

**Figure S3.** SEM images of (a) surface coarsened  $\text{TiO}_2$  nanobelts; (b)  $\text{Sn}_3\text{O}_4/\text{TiO}_2$  (molar ratio  $\text{Sn}/\text{Ti}=1/1$ ) heterostructure; (c, d)  $\text{Sn}_3\text{O}_4/\text{TiO}_2$  (molar ratio  $\text{Sn}/\text{Ti}=3/1$ ) heterostructure of different magnification

$\text{Sn}_3\text{O}_4/\text{TiO}_2$  with different initial Sn/Ti molar ratios of 1/1 and 3/1 were conducted and their SEM images are presented in Figure S3b-d. Similar hierarchical  $\text{TiO}_2$  nanobelts structures with less heterojunctional density are observed when Sn/Ti is 1/1. When the Sn/Ti molar ratio is 3/1, the  $\text{Sn}_3\text{O}_4$  flakes cover almost completely the  $\text{TiO}_2$  nanobelts and excessive nanoflakes gathered into aggregates are absorbed at the surface of the nanobelts.

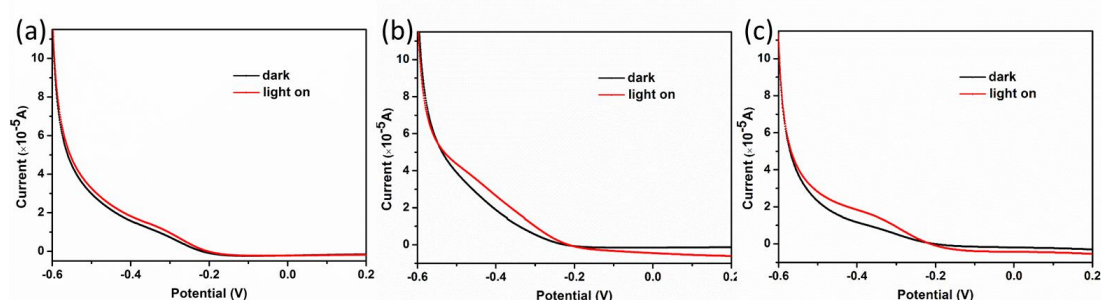

**Figure S4.** Current-potential ( $I$ - $V$ ) characteristics of (a)  $\text{TiO}_2$  nanobelt; (b)  $\text{Sn}_3\text{O}_4$  nanoflakes; (c) the  $\text{Sn}_3\text{O}_4/\text{TiO}_2$  (molar ratio Sn/Ti=2/1) nanobelts heterostructure at applied bias from -0.6 to 0.2 V under dark (black line) and simulated solar spectrum irradiation (red line).

Figure S4 shows  $I$ - $V$  curves of  $\text{Sn}_3\text{O}_4$ ,  $\text{TiO}_2$  and  $\text{Sn}_3\text{O}_4/\text{TiO}_2$  (molar ratio Sn/Ti=2/1) heterostructure. The high dark currents of  $\text{Sn}_3\text{O}_4$  and  $\text{Sn}_3\text{O}_4/\text{TiO}_2$  was determined by the applied bias voltage of -0.35 V, the corresponding dark current for  $\text{TiO}_2$ ,  $\text{Sn}_3\text{O}_4$  and  $\text{Sn}_3\text{O}_4/\text{TiO}_2$  was about  $11.5 \mu\text{A}$ ,  $12.9 \mu\text{A}$ , and  $11.1 \mu\text{A}$ , respectively. The reason for the decrease currents at more positive voltage was probably that the bias potential not sufficient to produce electric field to favor separation of photoexcited chargers.<sup>3</sup>

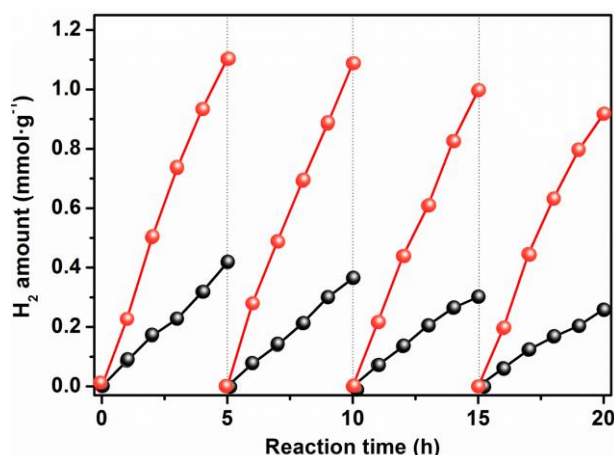

**Figure S5.** Cycle H<sub>2</sub> evolution of Sn<sub>3</sub>O<sub>4</sub>/TiO<sub>2</sub>-2 heterostructure as a function of time with (red line) and without (black line) 1 wt % Pt co-catalyst under irradiation of the 300W Xe arc lamp.

Figure S5 compared the photocatalytic stability of Sn<sub>3</sub>O<sub>4</sub>/TiO<sub>2</sub>-2 heterostructure with and without Pt as co-catalyst, after photo-deposited 1 wt % Pt, the Sn<sub>3</sub>O<sub>4</sub>/TiO<sub>2</sub>-2 heterostructure exhibited a higher average hydrogen evolution rate of 218.7  $\mu\text{mol}\cdot\text{h}^{-1}\cdot\text{g}^{-1}$ . Furthermore, the rate of hydrogen evolution dropped by a mere 20% after the fourth reaction cycle (20 h) without renewing the sacrificial agents (Figure S5 black line), and about 18.2% decrease with 1 wt % Pt as co-catalyst (Figure S5 red line), indicating a good cyclability for the Sn<sub>3</sub>O<sub>4</sub>/TiO<sub>2</sub>-2 heterostructure. The hydrogen evolution rate of TiO<sub>2</sub> nanobelts with 1wt % Pt as co-catalyst was 127.3  $\mu\text{mol}\cdot\text{h}^{-1}\cdot\text{g}^{-1}$ , which was higher than that of Sn<sub>3</sub>O<sub>4</sub> (102.2  $\mu\text{mol}\cdot\text{h}^{-1}\cdot\text{g}^{-1}$ ). This is mainly because TiO<sub>2</sub> has a higher density of states (DOS) in its unique *d*-orbital conduction band, which showed better hot-electron-accepting ability in the TiO<sub>2</sub>-Pt Schottky barrier.<sup>4</sup> The good hydrogen evolution activity of Sn<sub>3</sub>O<sub>4</sub>/TiO<sub>2</sub>-Pt (218.7  $\mu\text{mol}\cdot\text{h}^{-1}\cdot\text{g}^{-1}$ ) further indicate the leading effect of heterostructure between Sn<sub>3</sub>O<sub>4</sub> and TiO<sub>2</sub> that greatly promote the separation and transfer of photoexcited charges. The existence of Sn ions in the solution are detected via adding NaOH to the solution. Precipitates were not observed during the experiment, indicating there was no or negligible Sn ions in the solution.

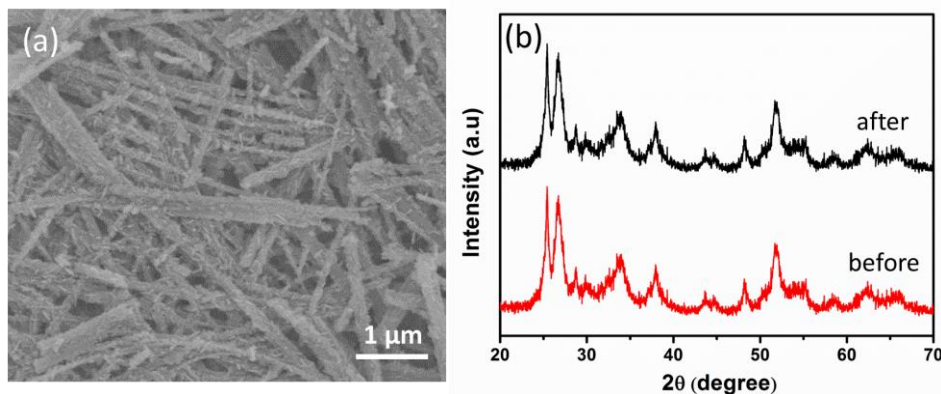

**Figure S6.** (a) SEM image of scaly  $\text{Sn}_3\text{O}_4/\text{TiO}_2$  (molar ratio  $\text{Sn}/\text{Ti}=2/1$ ) nanobelts heterostructure after hydrogen evolution; (b) XRD patterns of the  $\text{Sn}_3\text{O}_4/\text{TiO}_2$  heterostructure before (red curve) and after (black curve) hydrogen evolution.

Based on the SEM image and XRD data above, we can conclude that morphology and crystal structure of the nanocomposites are visibly not affected by the hydrogen evolution.

**Table S1. The BET specific surface areas of different samples.**

| Sample                                                                | Specific surface area ( $\text{m}^2\cdot\text{g}^{-1}$ ) |
|-----------------------------------------------------------------------|----------------------------------------------------------|
| Surface coarsened $\text{TiO}_2$ nanobelts                            | 38.591                                                   |
| $\text{Sn}_3\text{O}_4$ nanoflakes                                    | 43.128                                                   |
| Scaly $\text{Sn}_3\text{O}_4/\text{TiO}_2$ nanobelts heterostructures | 51.549                                                   |

The  $\text{Sn}_3\text{O}_4/\text{TiO}_2$ -2 heterostructure display a larger specific surface area ( $51.5 \text{ m}^2\cdot\text{g}^{-1}$ ) than single  $\text{Sn}_3\text{O}_4$  nanoflakes (about  $43.1 \text{ m}^2\cdot\text{g}^{-1}$ ) (Table S1) and single surface coarsened  $\text{TiO}_2$  nanobelts ( $38.6 \text{ m}^2\cdot\text{g}^{-1}$ ),<sup>2</sup> the increased specific surface area can be result from the fabrication of  $\text{Sn}_3\text{O}_4/\text{TiO}_2$  hierarchical nanostructures, as SEM and TEM images (Figure 2d and Figure 3c) show,  $\text{Sn}_3\text{O}_4$  nanoflakes extended the surface area of  $\text{TiO}_2$  by growing along the 1D  $\text{TiO}_2$  nanobelts. While single  $\text{Sn}_3\text{O}_4$  sample would likely to gather into aggregates.

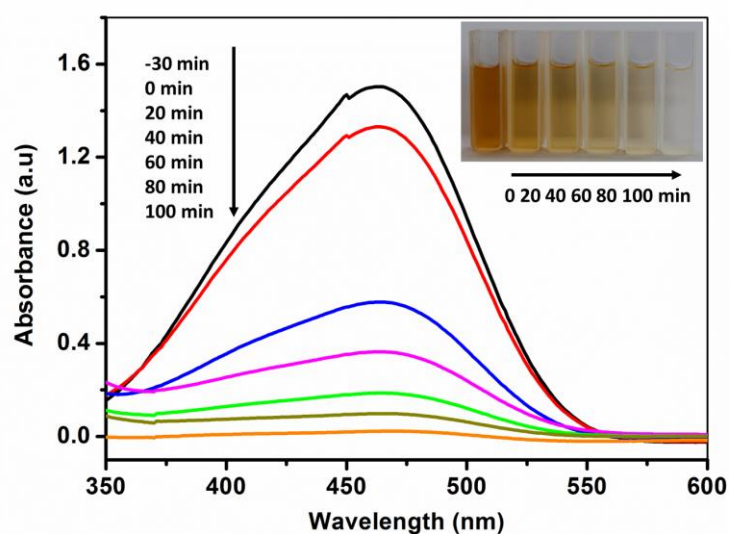

**Figure S7.** Typical UV-vis spectra and photographs (up right inset) of methyl orange solution at different simulated solar spectrum irradiation time intervals by using  $\text{Sn}_3\text{O}_4/\text{TiO}_2$  (molar ratio  $\text{Sn}/\text{Ti}=2/1$ ) nanobelts heterostructure as photocatalyst.

The degradation of MO dye was used to assess the photodegradation ability of the photocatalysts.

The concentration of MO at time  $t$  and time  $t=0$ , was measured by its optical absorbance at 465 nm (Figure S7). The high degradation efficient in the initial 20 minutes was partially because of the absorption of MO during the adsorption-desorption equilibrium and the kinetic process of photocatalysis.<sup>5</sup>

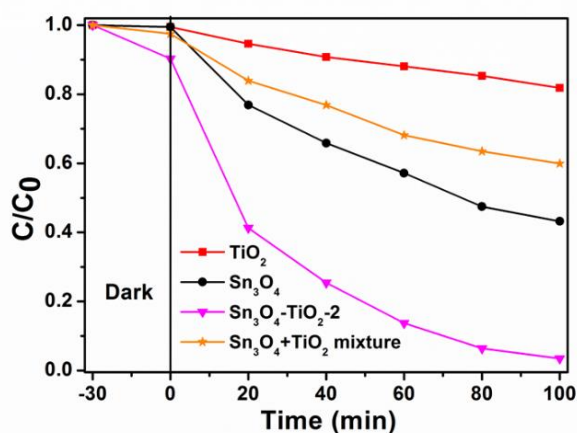

**Figure S8.** Photodegradation activity of physical mixture sample that composed of 47.5 wt%  $\text{TiO}_2$  and 52.5 wt%  $\text{Sn}_3\text{O}_4$  in comparison with  $\text{TiO}_2$ ,  $\text{Sn}_3\text{O}_4$ , and  $\text{Sn}_3\text{O}_4/\text{TiO}_2$ -2 heterostructure under simulated solar spectrum irradiation.

Photocatalytic activity of the physical mixture of 47.5 wt% TiO<sub>2</sub> nanobelts and 52.5 wt% Sn<sub>3</sub>O<sub>4</sub> nanoflakes that in agreement with the component of Sn<sub>3</sub>O<sub>4</sub>/TiO<sub>2</sub>-2 heterostructure as indicated by EDS, was measured under simulated solar spectrum irradiation. As shown in Figure S8, the degradation rate of the physical mixture sample was much lower than Sn<sub>3</sub>O<sub>4</sub>/TiO<sub>2</sub>-2 heterostructure, also proved the heterojunction plays a positive role in photoexcited charge transfer and separation.

## References

- 1 J. F. Reeves, S. J. Davies, N. J. Dodd and A. N. Jha, *Mutation Research/Fundamental and Molecular Mechanisms of Mutagenesis*, 2008, 640, 113-122.
- 2 J. Tian, Y. Sang, Z. Zhao, W. Zhou, D. Wang, X. Kang, H. Liu, J. Wang, S. Chen, H. Cai and H. Huang, *Small*, 2013, 9, 3864-3872.
- 3 J. H. Sohn, H. G. Cha, C. W. Kim, D. K. Kim and Y. S. Kang, *Nanoscale*, 2013, 5, 11227-11233.
- 4 C. Clavero, *Nature Photonics*, 2014, 8, 95-103.
- 5 N. Barka, S. Ourzal, A. Assabbane and Y. Ait-Ichou, *Journal of Environmental Science and Engineering*, 2010, 4, 1-5.
